# Supplementary material
Source: PubMed Central journal article supplement (PMC1937552)
Supplement: pnas_0705803104_2.pdf [file pnas_0705803104_2.pdf]

## Supporting Text

*The likelihood function for male models that incorporate bias correction factor*

Denote  $r_{nm}$ , the bias correction factor for families of shape  $F(n, m)$ ,  $3 \leq n \leq 5$  and  $m \geq 2$ .

The log-likelihood function incorporating  $r_{nm}$  is given by

$$[\text{Eq. 1}] LL(\theta) = \sum_{n=3}^5 \sum_{m=2}^n \text{obs}(n, m) \log(P_{\theta}(n, m | m \geq 2))$$

where  $P_{\theta}(n, m | m \geq 2)$  is the conditional probability that equals to  $\frac{r_{nm} P_{\theta}(n, m)}{\sum_{k \geq 2} r_{nk} P_{\theta}(n, k)}$ . In the

paper, when  $m = 2$ , we set  $r_{nm} = 1$  and when  $m > 2$ ,  $r_{nm}$ s have the same value, estimated using the gender asymmetry method in the second section of *Results*.

*The likelihood function for models that distinguish males and females by penetrance.*

Denote  $P(n, m, n_{AM}, n_{UM}, n_{AF}, n_{UF})$  the probability that a family of size  $n$  with  $m$  children with autism has  $n_{AM}$  males with autism,  $n_{UM}$  typical males,  $n_{AF}$  females with autism and  $n_{UF}$  typical females. That probability under the model that distinguishes males and females by penetrance  $p$  is given by

$$[\text{Eq. 2}] P(n, m, n_{AM}, n_{UM}, n_{AF}, n_{UF}) = \int_0^1 \binom{n}{n_{AM}, n_{AF}, n_{UM}, n_{UF}} (q_m x)^{n_{AM}} (q_f p x)^{n_{AF}} (q_m (1-x))^{n_{UM}} (q_f (1-px))^{n_{UF}} f(x) dx$$

where  $x$  is the probability of male offspring with autism,  $q_m = 105/205$  and

$q_f = 100/205$ .

Let  $F(n, m, n_{AM}, n_{UM}, n_{AF}, n_{UF})$  denote the type of such a family and we observe  $obs(n, m, n_{AM}, n_{UM}, n_{AF}, n_{UF})$  families of that type. The log likelihood function for families with  $3 \leq n \leq 5$  and  $m \geq 2$  is given by

$$[\text{Eq. 3}] LL(\theta) = \sum_{n=3}^5 \sum_{m=2}^n obs(n, m, n_1, n_2, n_3, n_4) \log(P_\theta(n, m, n_1, n_2, n_3, n_4 | m \geq 2)),$$

where  $P_\theta(n, m, n_1, n_2, n_3, n_4 | m \geq 2)$  equals to  $\frac{r_{nm} P_\theta(n, m, n_1, n_2, n_3, n_4)}{\sum_{k \geq 2} r_{nk} P_\theta(n, k, n_1, n_2, n_3, n_4)}$ . Here  $r_{nm}$  are

ascertainment bias factors as described previously.

#### *Simulation in goodness-of-fit test for model 2(m) and 2(m/f/p)*

For model 2(m), based on the parameters estimated from the AGRE set, we calculated the probability  $P_\theta(n, m | m \geq 2)$  for  $3 \leq n \leq 5$  and  $2 \leq m \leq n$ , and then computed the expected number of families of shape  $F(n, m)$  conditional on the total number of male sibships of size  $n$  with at least two autistic children. Bias correction factor 1.14 was used for AGRE set, 1.0 was used for UMICH set, and 1.06 was used for IAN set. The Pearson  $\chi^2$  statistic was calculated to summarize the difference between the observed number of  $F(n, m)$  families (in the AGRE, University of Michigan, or IAN sets) and the expected number of  $F(n, m)$  families from our model, for  $n = 3, 4, 5$ , and  $2 \leq m \leq n$ . Simulations based on multinomial distribution  $P_\theta(n, m | m \geq 2)$  were carried out 1,000 times to compute the empirical distribution of the  $\chi^2$  statistic which was then used to calculate the  $P$  value.

Similarly for model 2(m/f/p), based on the parameters estimated from the AGRE set, we calculated the probability  $P_\theta(n, m, n_1, n_2, n_3, n_4 | m \geq 2)$  for  $3 \leq n \leq 5$  and  $2 \leq m \leq n$ , and then computed the expected number of families  $F(n, m, n_1, n_2, n_3, n_4)$  conditional on the total number of families of size  $n$  with at least two autistic children. Pearson  $\chi^2$  statistic was

calculated to summarize the difference between the observed number of  $F(n, m, n_{AM}, n_{UM}, n_{AF}, n_{UF})$  families (in the AGRE, University of Michigan, or IAN sets) and the expected number of  $F(n, m, n_{AM}, n_{UM}, n_{AF}, n_{UF})$  families from our model, for  $n = 3, 4, 5$  and  $2 \leq m \leq n$ . Simulations based on multinomial distribution  $P_{\theta}(n, m, n_1, n_2, n_3, n_4 \mid m \geq 2)$  were carried out 1,000 times to compute the empirical distribution of the  $\chi^2$  statistic which was then used to calculate the  $P$  value.

*Monte Carlo simulation for calculating P values in likelihood ratio test*

When testing a three-component model (alternative hypothesis) against a two-component model (null hypothesis), we estimated the  $P$  value using a Monte Carlo method. We simulated 100 sets of data under the null model based on the parameters estimated from the real data, as done in the simulation for goodness-of-fit test. We then computed the log-likelihood ratio between the null model and the alternative model on the simulated data, to establish a reference distribution of the log-likelihood ratio. The  $P$  value was then obtained by comparing the observed log-likelihood ratio to this reference distribution. Similar procedures were applied to calculate  $P$  values for other comparisons in Table 2.
