# Supplementary material
Source: PubMed Central journal article supplement (PMC1937552)

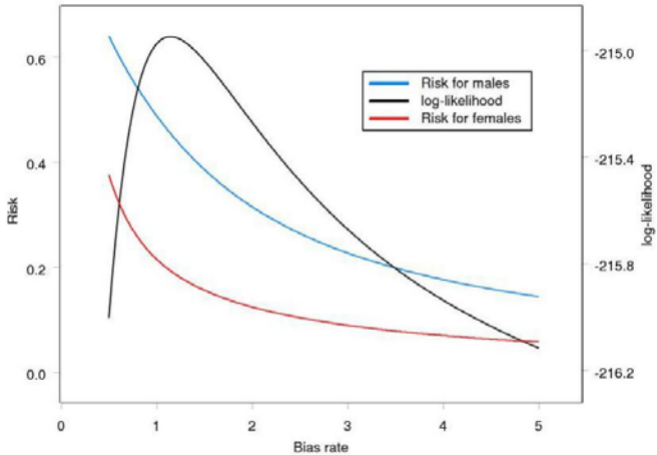

Supplement: pnas_0705803104_1.pdf [file pnas_0705803104_1.pdf]
